# Supplementary material
Source: publisher site journal article supplement (https://www.dovepress.com/article/253891)
Supplement: Supplementary file 1 [file get_supplementary_file.php]

# **Appendix**

**Table 1 Median OR duration and length of stay**

| **Index Procedure** | **Median OR Duration (minutes)**  **Median (IQR)** | ***p*-value** | **Median LOS (hours)**  **Median (IQR)** | ***p*-value** |
| --- | --- | --- | --- | --- |
| **TFA (n=44)** | 79.0 (52.0) | ref | 7.9 (2.4) | ref |
| **Myomectomy (n=44)** | 128.0 (94.5) | 0.004 | 28.0 (47.0)a | 0.004 |
| **Notes:** *p*-value: t-test assuming unequal variances; a n=43 due to missing data.  **Abbreviations:** IQR, interquartile range; LOS, length of stay; OR, operating room; TFA, transcervical fibroid ablation | | | | |

**Table 2 Median procedure cost by site of service**

| **Index Procedure** | **Cost ($)**  **Median (IQR)** | ***p*-value** |
| --- | --- | --- |
| **TFA** | **6,744 (3,040)** | **Ref** |
| **Inpatient (n=0)** | N/A | - |
| **Outpatient (n=44)** | 6,744 (3,040) | Ref |
| **Myomectomy** | **7,431 (9,947)** | **0.663** |
| **Inpatient (n=15)** | 17,106 (9,575) | 0.001 |
| **Outpatient (n=29)** | 6,604 (1,302) | 0.788 |
| **Notes:** *p*-value: t-test assuming unequal variances  **Abbreviations:** IQR, interquartile range; TFA, transcervical fibroid ablation | | |

**Table 3 Median procedure cost by route**

| **Index Procedure** | **Cost ($)**  **Median (IQR)** | ***p*-value** |
| --- | --- | --- |
| **TFA (All Transcervical; n=44)** | **6,744 (3,040)** | **Ref** |
| **Myomectomy** | **7,431 (9,947)** | **0.663** |
| **Abdominal (n=11)** | 16,924 (10,917) | 0.012 |
| **Laparoscopic (n=26)** | 7,212 (2,360) | 0.475 |
| **Hysteroscopic (n=7)** | 4,524 (1,073) | - |
| **Notes:** *p*-value: t-test assuming unequal variances, value not reported when n<10  **Abbreviations:** IQR, interquartile range; TFA, transcervical fibroid ablation | | |

**Table 4 Median procedure and hospitalization cost**

| **Index Procedure** | **TFA (n=44)**  **Median (IQR) ($)** | **Myomectomy (n=44)**  **Median (IQR) ($)** | ***p*-value** |
| --- | --- | --- | --- |
| **Total costs** | **6,744 (3,040)** | **7,431 (9,947)** | **0.663** |
| **Procedure costs** | 2,358 (2,598) | 3,677 (8,714)a | 0.346 |
| **Anesthesia costs** | 360 (165) | 720 (445)a | <0.001 |
| **Supply costs** | 4,022 (75) | 1,891 (1,583) | <0.001 |
| **Lab costs** | 2 (12) | 32 (156) | 0.210 |
| **Pathology costs** | 0 (0) | 99 (94) | <0.001 |
| **Pharmacy costs** | 0 (3) | 233 (212)a | <0.001 |
| **Notes:** *p*-value: t-test assuming unequal variances; a n=43 due to missing data.  **Abbreviations:** IQR, interquartile range; TFA, transcervical fibroid ablation | | | |

**Table 5 CPT Procedure Codes for Myomectomy (Hospital Outpatient and Physician Procedure Codes)**

| **CPT Code** | **Code Definition** |
| --- | --- |
| **58140** | Myomectomy, excision of fibroid tumor(s) of uterus, 1 to 4 intramural myoma(s) with total weight of 250 g or less and/or removal of surface myomas; abdominal approach |
| **58145** | Myomectomy, excision of fibroid tumor(s) of uterus, 1 to 4 intramural myoma(s) with total weight of 250 g or less and/or removal of surface myomas; vaginal approach |
| **58146** | Myomectomy, excision of fibroid tumor(s) of uterus, 5 or more intramural myomas and/or intramural myomas with total weight greater than 250 g, abdominal approach |
| **58545** | Laparoscopy, surgical, myomectomy, excision; 1 to 4 intramural myomas with total weight of 250 g or less and/or removal of surface myomas |
| **58546** | Laparoscopy, surgical, myomectomy, excision; 5 or more intramural myomas and/or intramural myomas with total weight greater than 250 g |
| **58561** | Hysteroscopy, surgical; with removal of leiomyomata |
| **Robotic Assistance** (use in addition to myomectomy CPT codes) | |
| **S2900** | Surgical techniques requiring use of robotic surgical system [ADD-ON CODE)) |

**Institutional Review Board and Ethics Committee Approval Information:**

Each site in the SONATA clinical trial gained local IRB approval or ethics committee approval, and the patients used in the SONATA trial provided appropriate consent for the data collected and reported in this study. The data in the myomectomy arm was collected retrospectively, and proper IRB approval or waiver was given by each site that provided data to the study. Below is a list of institutions that participated in the SONATA clinical trial and provided patient data for the myomectomy arm of this study where local IRB or ethics committee approval was utilized:

Benaroya Research Institute at Virginia Mason Medical Center, Seattle, WA, United States

Drexel University College of Medicine, Philadelphia, PA, United States

Greenville Health System, Greenville, SC, United States

Mercy Clinical Minimally Invasive Gynecology, St. Louis, MO, United States
